# Supplementary material for: Eco-evolutionary dynamics of nested Darwinian populations and the emergence of community-level heredity
Source: eLife journal article supplement (doi:10.7554/elife.53433), 2020-07-07
Supplement: supp [file elife-53433-supp-v1.zip]

Archive with 2 entries (2 files):
- elife_poa_e53433_Source_code_1.zip
- elife_poa_e53433_Transparent_Reporting_File.pdf
